# Supplementary material for: Serum neurofilament light chain concentration in a phase 1/2 trial of autologous mesenchymal stem cell transplantation
Source: PubMed Central journal article supplement — Mult Scler J Exp Transl Clin. 2019 Nov 5;5(4):2055217319887198. doi: 10.1177/2055217319887198 (PMC6831979; doi:10.1177/2055217319887198), 2019-11-05

## Supplementary Material

**Supplementary Table 1 – sNfL-c correlation with advanced MRI metrics**

|                                                | <b>Spearman's Rho<br/>(95% CI)</b> |
|------------------------------------------------|------------------------------------|
| Cortical thickness                             | -0.23 (-0.74, 0.28)                |
| Whole brain magnetization transfer ratio (MTR) | -0.11 (-0.55, 0.33)                |
| Peak position                                  | -0.03 (-0.54, 0.48)                |
| Peak height                                    | 0.35 (-0.08, 0.78)                 |
| Whole brain mean diffusivity (MD)              | 0.15 (-0.47, 0.77)                 |
| Peak position                                  | 0.06 (-0.50, 0.62)                 |
| Peak height                                    | -0.10 (-0.67, 0.47)                |
| Whole brain fractional anisotropy (FA)         | -0.07 (-0.58, 0.44)                |
| Peak position                                  | 0.01 (-0.41, 0.42)                 |
| Peak height                                    | -0.26 (-0.76, 0.25)                |
| Lesional tissue DTI                            |                                    |
| Mean diffusivity                               | 0.23 (-0.30, 0.76)                 |
| Transverse diffusivity                         | 0.04 (-0.49, 0.57)                 |
| Axial diffusivity                              | 0.36 (-0.04, 0.76)                 |
| Fractional anisotropy                          | 0.18 (-0.24, 0.59)                 |
| Corticospinal tracts (mean) DTI                |                                    |
| Mean diffusivity                               | 0.25 (-0.27, 0.77)                 |
| Transverse diffusivity                         | 0.29 (-0.17, 0.75)                 |
| Axial diffusivity                              | 0.16 (-0.37, 0.68)                 |
| Fractional anisotropy                          | -0.19 (-0.63, 0.25)                |
| Transcallosal motor tract DTI                  |                                    |
| Mean diffusivity                               | 0.23 (-0.31, 0.77)                 |
| Transverse diffusivity                         | 0.26 (-0.26, 0.77)                 |
| Axial diffusivity                              | 0.17 (-0.35, 0.68)                 |
| Fractional anisotropy                          | -0.33 (-0.78, 0.13)                |

**Supplementary Figure 1** – Longitudinal Stability of sNfL-c in Patients With and Without New/Enlarging T2 Lesions

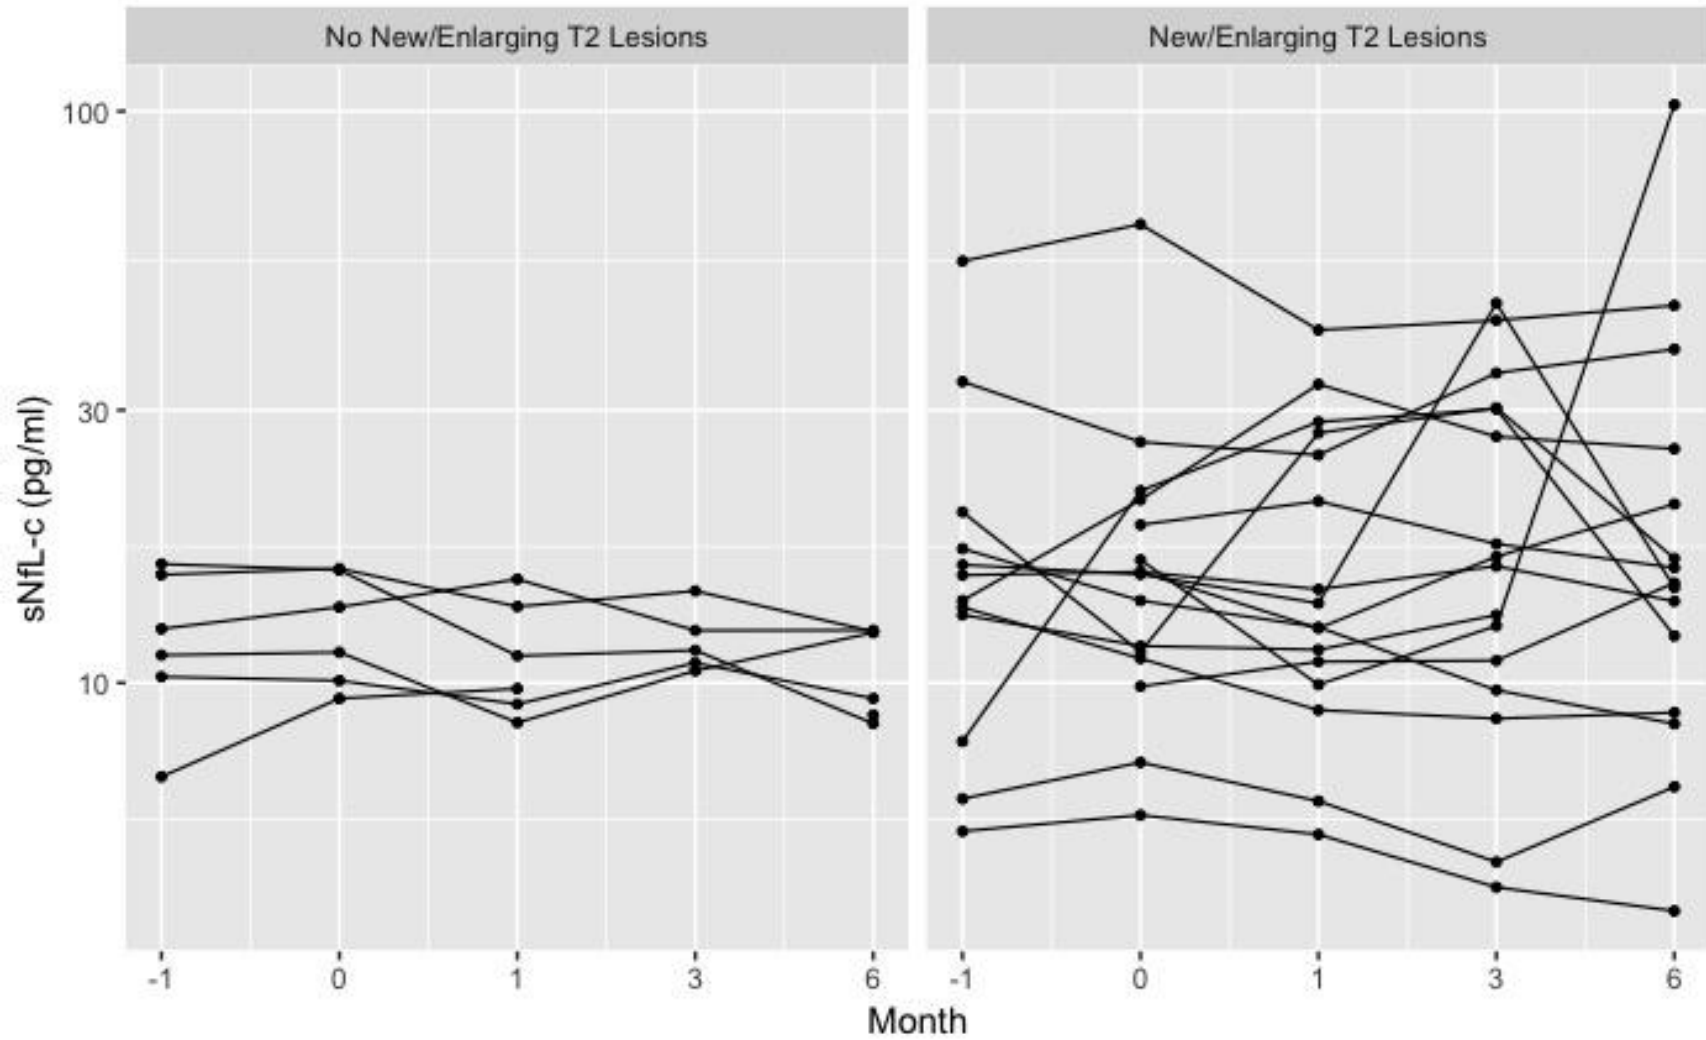

**Supplementary Figure 2 – Longitudinal Stability of sNfL-c in Patients With and Without Gadolinium-Enhancing Lesions**

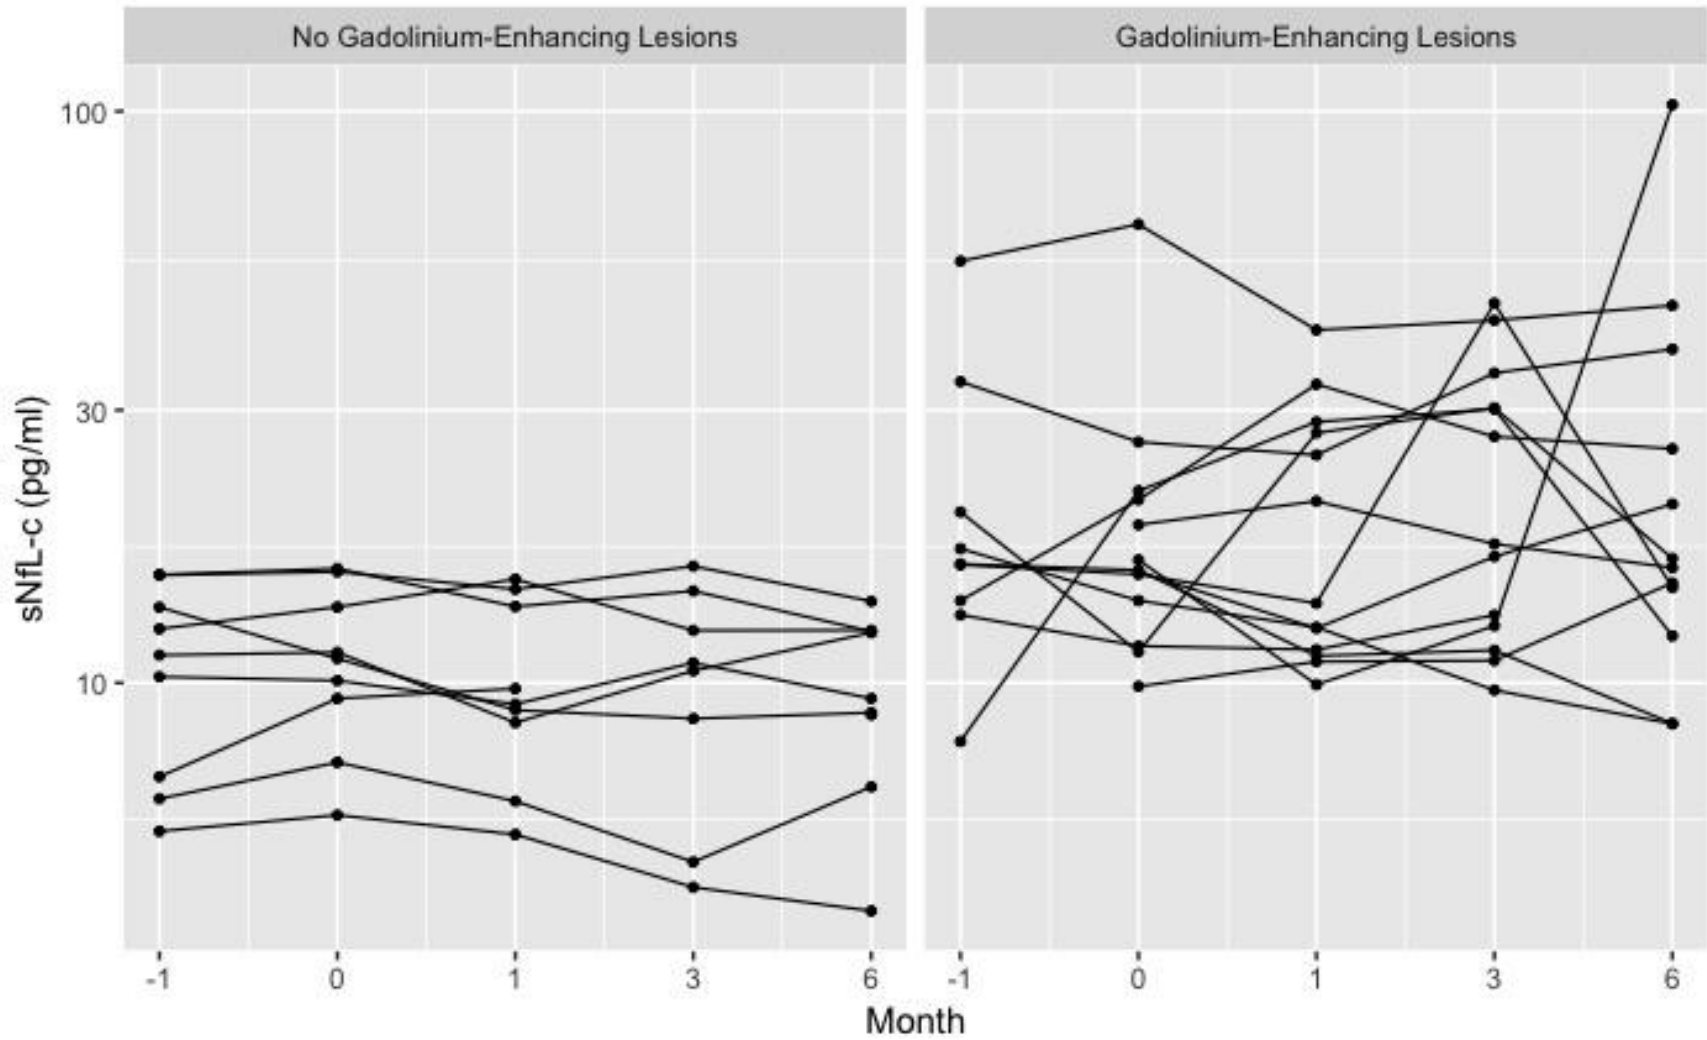

**Supplementary Figure 3 – Longitudinal Stability of sNfL-c in Patients With and Without Clinical Relapses**

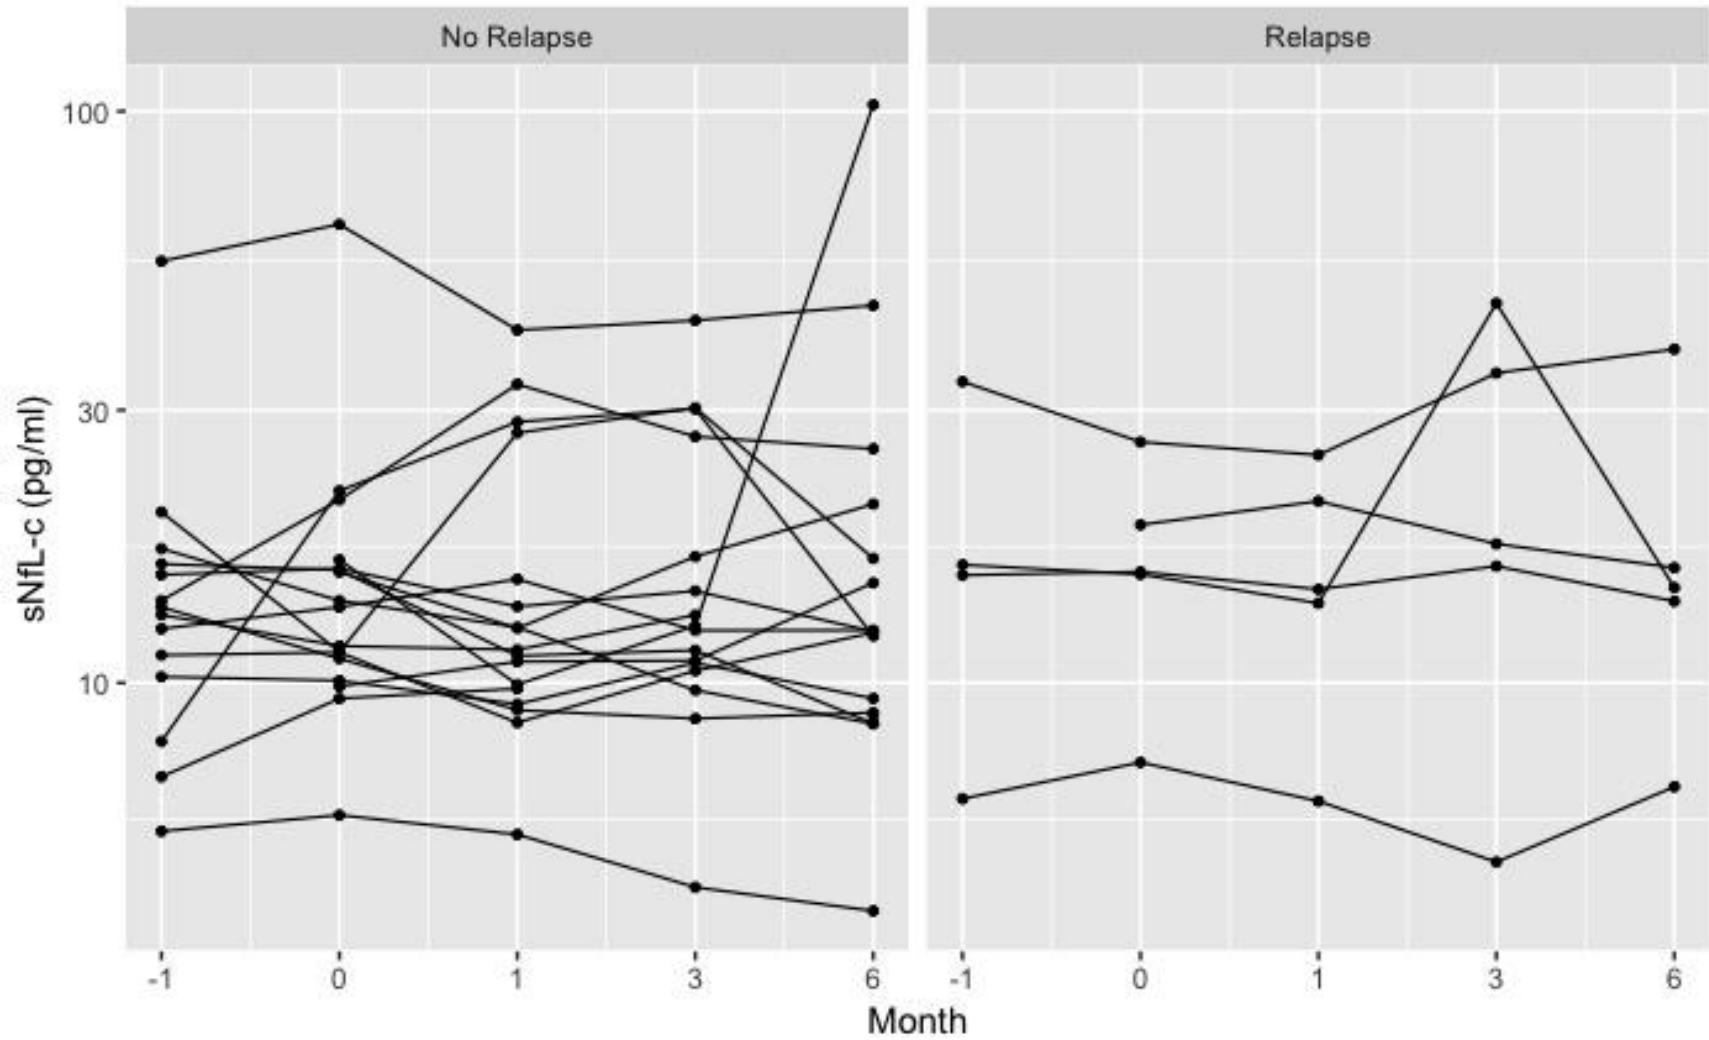

Supplement: MSO887198_Supplemetal_Material.pdf [file MSO887198_Supplemetal_Material.pdf]
